# Supplementary material for: Synthesis and characterization of fluorinated poly(aryl ether)s with excellent dielectric properties
Source: Royal Society of Chemistry journal article supplement (doi:10.1039/d4py00119b), 2024-01-01
Supplement: d4py00119b1.pdf [file d4py00119b1.pdf]

## Synthesis and characterization of fluorinated poly(aryl ether)s with excellent dielectric properties

Hao Zheng,<sup>a,b</sup> Zejun Zheng,<sup>b</sup> Dirong Gong,<sup>a</sup> Chun Tian,<sup>\*b</sup> You Wen,<sup>\*b</sup> Zhen Wang<sup>b</sup> and Jingling Yan<sup>b</sup>

<sup>a</sup> School of Materials Science & Chemical Engineering, Ningbo University, Ningbo 315211, People's Republic of China

<sup>b</sup> Ningbo Institute of Materials Technology & Engineering, Chinese Academy of Science, Ningbo 315201, People's Republic of China

Corresponding authors: Chun Tian, tianchun@nimte.ac.cn; You Wen, wenyoun@nimte.ac.cn

List of Contents for Supplementary Materials:

**Figure S1.** <sup>1</sup>H NMR spectrum of TFBP in DMSO-*d*<sub>6</sub>

**Figure S2.** <sup>1</sup>H NMR spectrum of BDTF in DMSO-*d*<sub>6</sub>

**Figure S3.** FT-IR spectra of FPAEs

**Figure S4.** <sup>19</sup>F NMR spectrum of FPAE-5 in CDCl<sub>3</sub>

**Figure S5.** <sup>13</sup>C NMR spectrum of FPAE-4 in CDCl<sub>3</sub>

**Figure S6.** HSQC 2D NMR spectrum of FPAE-4 in CDCl<sub>3</sub>

**Figure S7.** HMBC 2D NMR spectrum of FPAE-4 in CDCl<sub>3</sub>

**Figure S8.** TGA curves of FPAEs in nitrogen

**Figure S9.** TGA curves of FPAEs in air

**Figure S10.** DSC curves of FPAEs

**Figure S11.** Representative stress-strain curves of FPAEs

**Figure S12.** UV-Vis spectra of FPAEs

**Figure S13.** Images of FPAEs films

**Figure S14.** Dielectric properties (a)  $D_k$  and (b)  $D_f$  of the FPAEs at 11GHz as a function of temperature

**Table S1.** Solubility properties of FPAEs

**Table S2.** Comparison of FPAEs in this work and other reported FPAEs

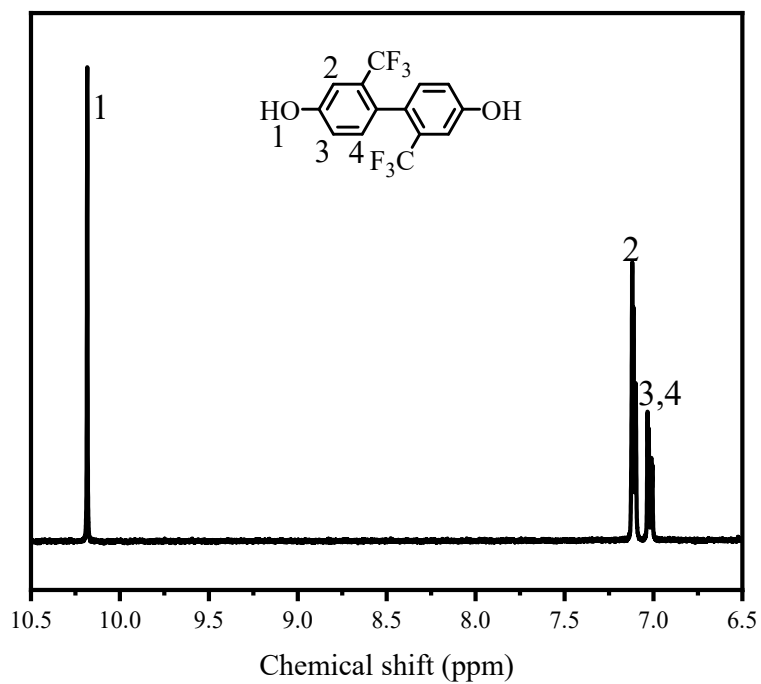

**Figure S1.**  $^1\text{H}$  NMR spectrum of TFBP in  $\text{DMSO-}d_6$

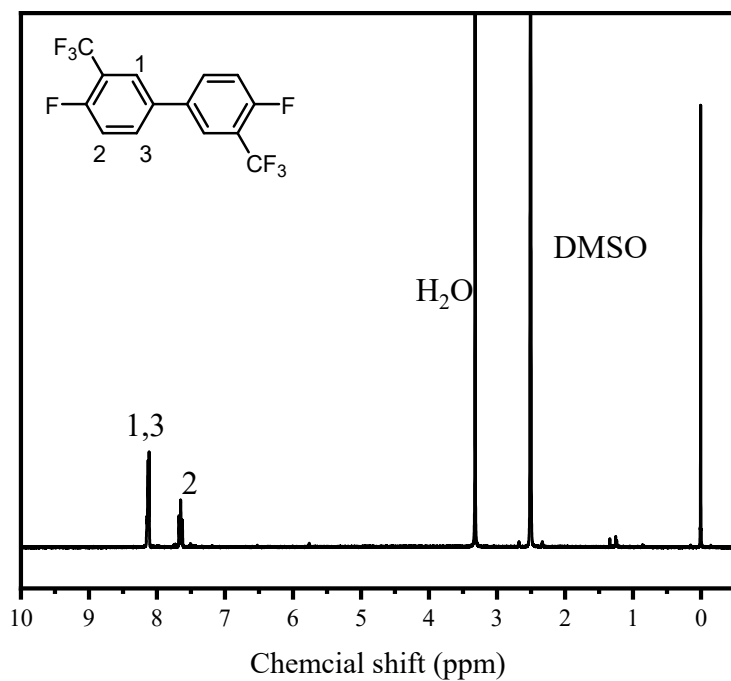

**Figure S2.**  $^1\text{H}$  NMR spectrum of BDTF in  $\text{DMSO-}d_6$

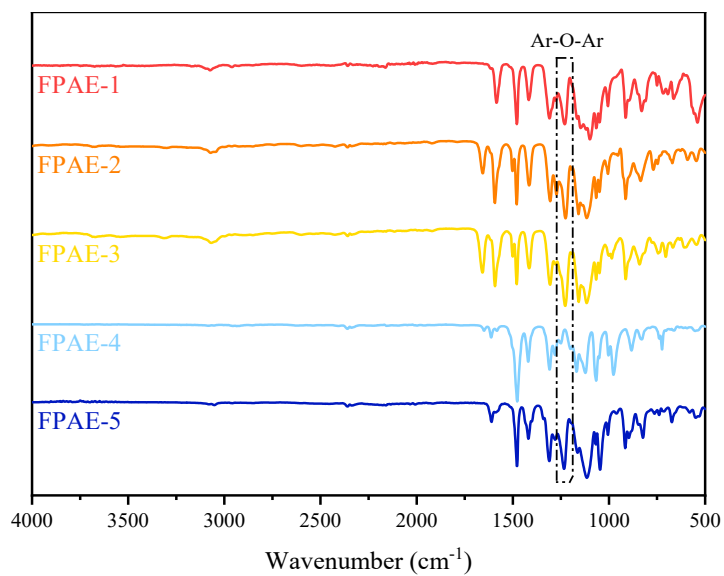

**Figure S3.** FT-IR spectra of FPAEs

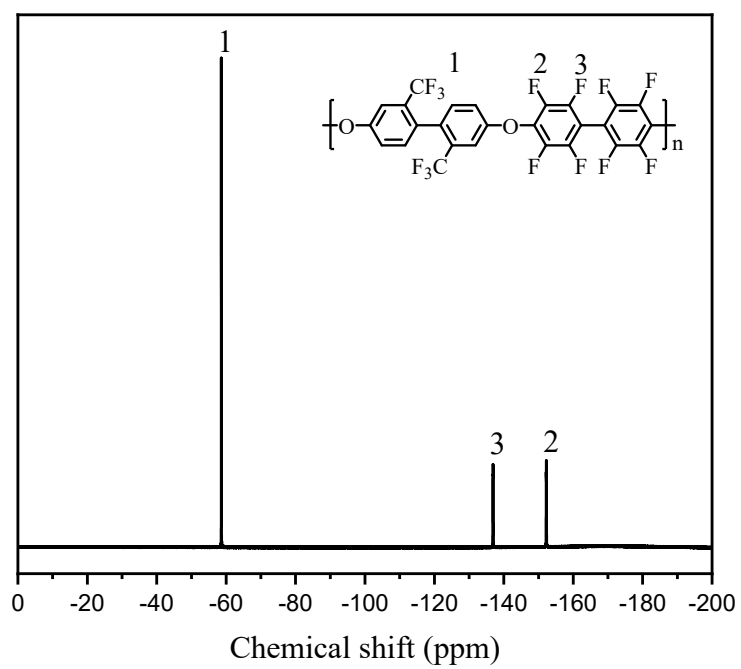

**Figure S4.** <sup>19</sup>F NMR spectrum of FPAE-5 in CDCl<sub>3</sub>

**Figure S5.**  $^{13}\text{C}$  NMR spectrum of FPAE-4 in  $\text{CDCl}_3$

**Figure S6.** HSQC 2D NMR spectrum of FPAE-4 in  $\text{CDCl}_3$

**Figure S7.** HMBC 2D NMR spectrum of FPAE-4 in in  $\text{CDCl}_3$

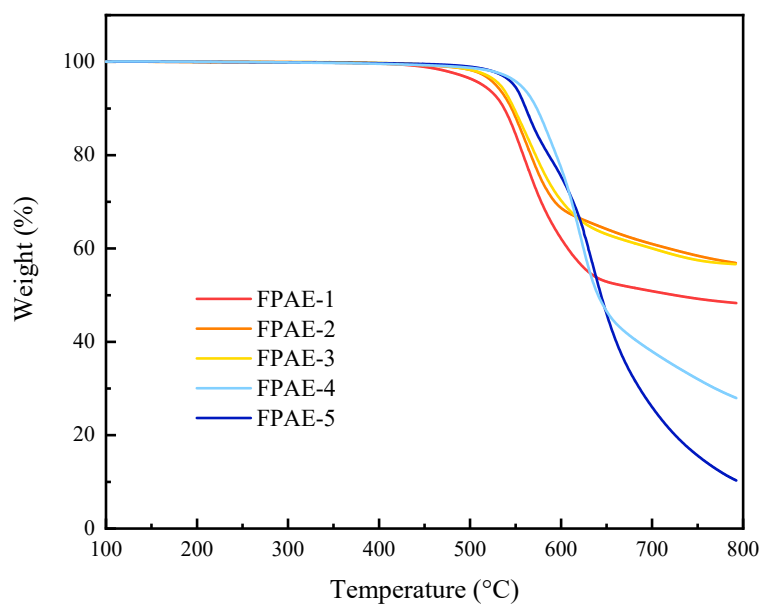

**Figure S8.** TGA curves of FPAEs in nitrogen

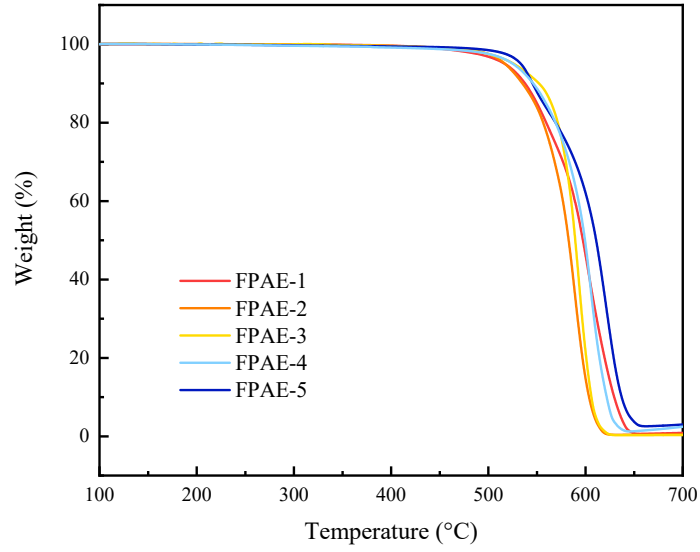

**Figure S9.** TGA curves of FPAEs in air

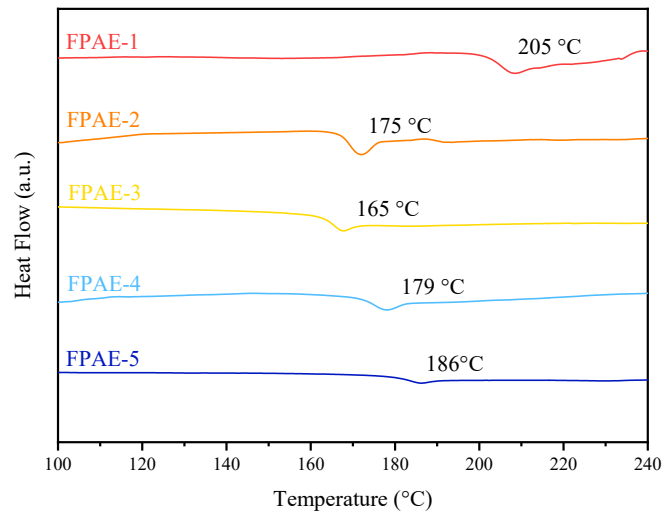

**Figure S10.** DSC curves of FPAEs

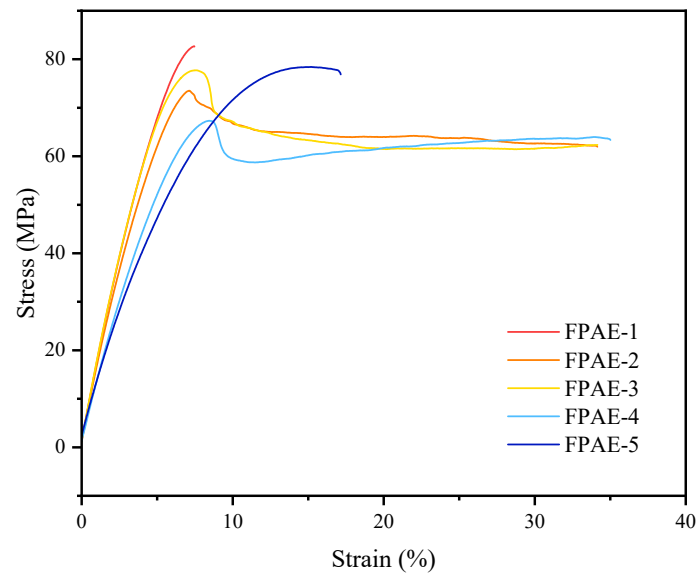

**Figure S11.** Representative stress-strain curves of FPAEs

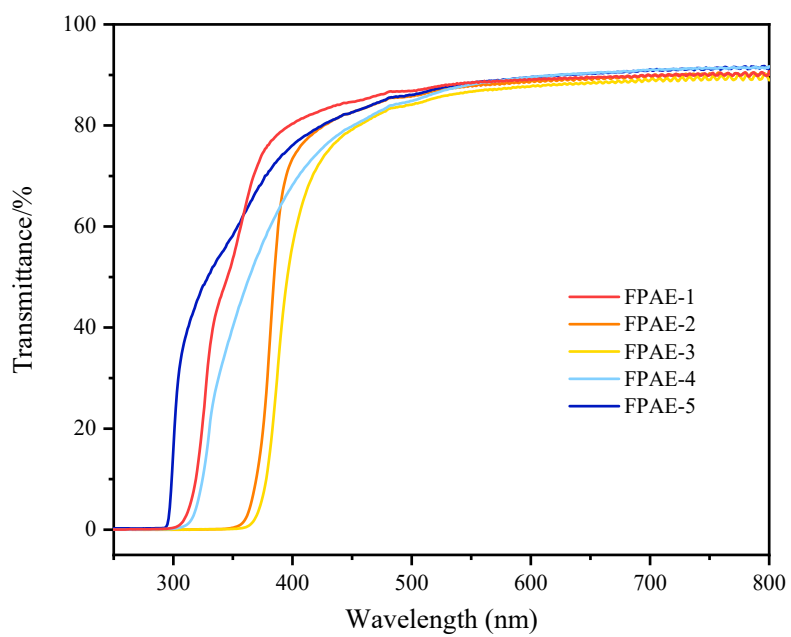

**Figure S12.** UV-Vis spectra of FPAEs

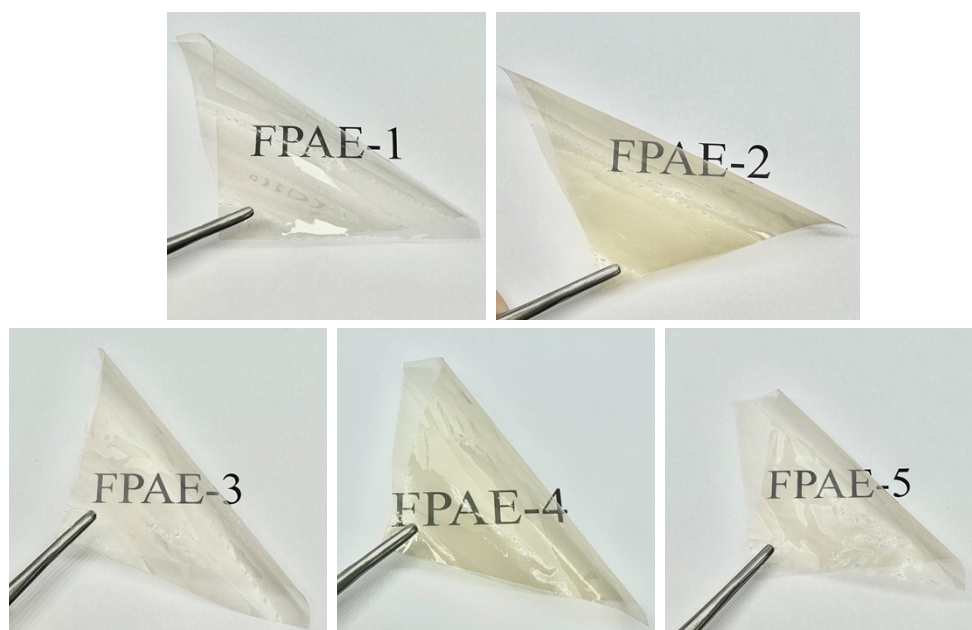

**Figure S13.** Images of FPAEs films

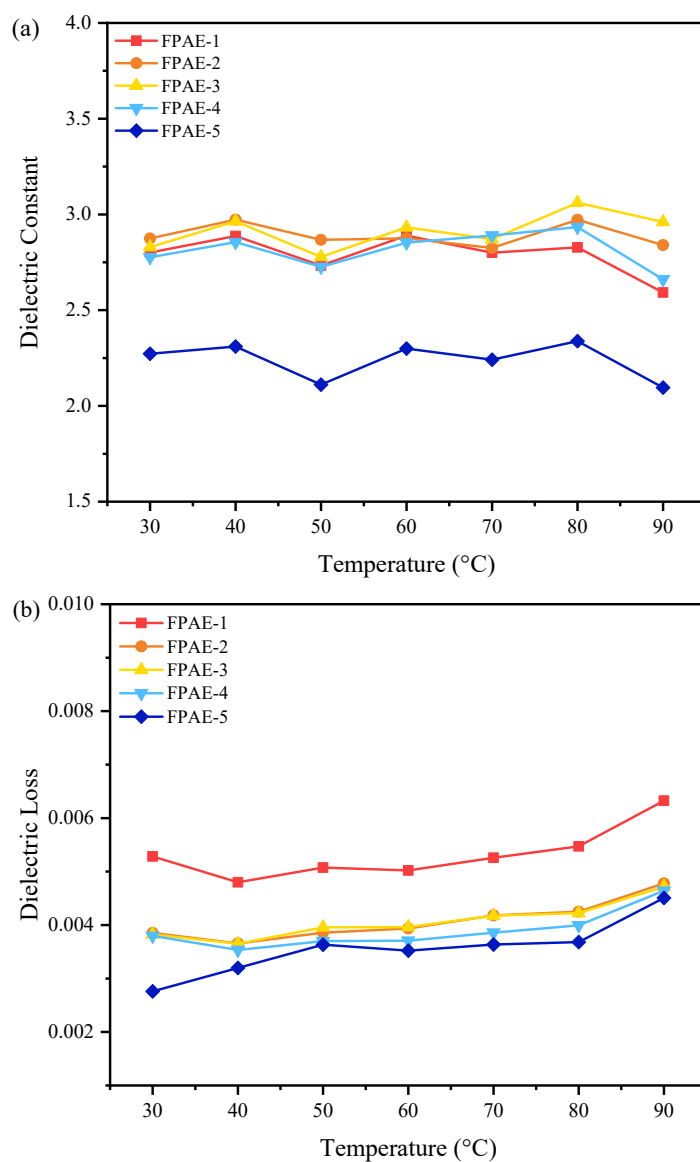

**Figure S14.** Dielectric properties (a)  $D_k$  and (b)  $D_f$  of the FPAEs at 11 GHz as a function of temperature

**Table S1.** Solubility properties of FPAEs <sup>a</sup>

| Entry  | NMP | <i>m</i> -cresol | DMAc | DMF | THF | 1,4-Dioxane | DMSO | CHCl <sub>3</sub> |
|--------|-----|------------------|------|-----|-----|-------------|------|-------------------|
| FPAE-1 | ++  | ++               | ++   | ++  | ++  | ++          | ++   | ++                |
| FPAE-2 | ++  | ++               | ++   | ++  | ++  | ++          | -    | ++                |
| FPAE-3 | ++  | ++               | ++   | ++  | ++  | ++          | +-   | ++                |
| FPAE-4 | ++  | -                | ++   | ++  | ++  | ++          | -    | ++                |
| FPAE-5 | ++  | -                | ++   | ++  | ++  | ++          | -    | ++                |

<sup>a</sup> Determined at a concentration of 0.1g·dL<sup>-1</sup>, ++: soluble at room temperature; +-: soluble on heating; -: insoluble on heating.



**Table S2.** Comparison of FPAEs in this work and other reported FPAEs

| Ref.      | FPAEs                                                                               | %F <sup>a</sup> | $D_k$             | $D_f$              | $T_g^b$<br>(°C) | $\sigma_t^c$<br>(MPa) | $E^d$ (%) |
|-----------|-------------------------------------------------------------------------------------|-----------------|-------------------|--------------------|-----------------|-----------------------|-----------|
| [1]       | 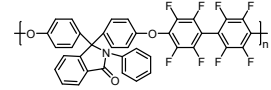   | 22.1            | 2.66<br>(1 MHz)   | 0.0063<br>(1 MHz)  | 260             |                       |           |
| [2]       |    | 37.6            | 2.31<br>(10 KHz)  | 0.0046<br>(10 KHz) | 127             |                       |           |
| [3]       |    | 36.7            | 2.81<br>(1 MHz)   | -                  | 181             |                       |           |
| [4]       |    | 8.9             | 3.04<br>(10 GHz)  | 0.0048<br>(10 GHz) | 213             |                       |           |
| [5]       |    | 42.2            | 2.61<br>(100 KHz) | -                  | 182             | 36.5                  | 12        |
| [5]       |    | 23.6            | 2.30<br>(100 KHz) | -                  | 262             |                       |           |
| This work |   | 37.5            | 2.26<br>(10 GHz)  | 0.004<br>(10 GHz)  | 195             | 72.7                  | 33.0      |
| This work |  | 43.2            | 2.07<br>(10 GHz)  | 0.002<br>(10 GHz)  | 200             | 73.2                  | 35.0      |

<sup>a</sup> Fluorine content; <sup>b</sup> Measured by DMA; <sup>c</sup> Tensile strength; <sup>d</sup> Elongation-at-break.

#### Reference

- (1) Wang, L.; Wang, Z.; Qu, M.; Zhou, G. Characterization of fluorinated poly(aryl ether) with low dielectric constant synthesized by nucleophilic polycondensation. *J. Polym. Res.*, 2023, **30**, 348.
- (2) Tkachenko, I. M.; Belov, N. A.; Yakovlev, Y. V.; Vakuliuk, P. V.; Shekera, O. V.; Yampolskii, Y. P.; Shevchenko, V. V. Synthesis, gas transport and dielectric properties of fluorinated poly(arylene ether)s based on decafluorobiphenyl. *Mate. Chem. Phys.*, 2016, **183**, 279-287.
- (3) Chung, I. S.; Kim, K. H.; Lee, Y. S.; Kim, S. Y. Poly(arylene ether)s with trifluoromethyl groups via meta-activated nitro displacement reaction. *Polymer*, 2010, **51**, 4477-4483.
- (4) Liu, X.; Sun, Y.; Chen, Y.; Zhao, Z.; Wang, Z.; Zhou, G. Design and synthesis of novel poly (aryl ether ketones) containing trifluoromethyl and trifluoromethoxy groups. *Des. Monomers Polym.*, 2023, **26**, 140-149.
- (5) Goodwin, A. A.; Atkinson, J. R.; Hay, J. N.; Mercer, F. W. Dielectric relaxation behaviour of fluorinated aromatic poly(ether)s and poly(ether ketone)s. *Polymer*, 1999, **40**, 1515-1524.
